# Supplementary material for: Impact of Morbid Obesity and Obesity Phenotype on Outcomes After Transcatheter Aortic Valve Replacement
Source: PubMed Central journal article supplement (PMC8477858; doi:10.1161/jaha.120.019051), 2021-05-31
Supplement: JAH3-10-e019051-s001.pdf [file JAH3-10-e019051-s001.pdf]

# **SUPPLEMENTAL MATERIAL**

**Table S1. Procedural aspects in unmatched non-obese and morbidly obese cohorts.**

|                                           | <b>BMI 18.5-29.9<br/>(n= 2,264)</b> | <b>BMI &gt;35<br/>(n= 910)</b> | <b>P</b> |
|-------------------------------------------|-------------------------------------|--------------------------------|----------|
| Procedural urgency                        |                                     |                                |          |
| Urgent/Emergent                           | 180 (9.7%)                          | 67 (8.2%)                      | 0.224    |
| Access site                               |                                     |                                |          |
| Transfemoral                              | 1994 (88.1%)                        | 784 (86.2%)                    | 0.139    |
| Non-transfemoral access                   | 270 (11.9%)                         | 126 (13.9%)                    | 0.139    |
| Method of transfemoral access*†           |                                     |                                |          |
| Percutaneous with closure device          | 1626 (93.9%)                        | 678 (89.8%)                    | <0.001   |
| Surgical cut down                         | 105 (6.1%)                          | 77 (10.2%)                     | <0.001   |
| Prosthesis type                           |                                     |                                |          |
| BEV                                       | 899 (39.7%)                         | 432 (47.5%)                    | <0.001   |
| SEV                                       | 1362 (60.2%)                        | 469 (51.5%)                    | <0.001   |
| Edwards Sapien & XT & S3                  | 899 (39.7%)                         | 432 (47.5%)                    | <0.001   |
| Medtronic Corevalve, Evolut R, Evolut Pro | 1065 (47.0%)                        | 403 (44.3%)                    | 0.159    |
| Other (portico, accurate neo, other)      | 300 (13.2%)                         | 75 (8.2%)                      | <0.001   |
| Prosthesis size                           |                                     |                                |          |
| 20 – 23 mm                                | 525 (23.5%)                         | 207 (22.9%)                    | 0.782    |
| 25 – 27 mm                                | 1005 (45.0%)                        | 394 (44.1)                     | 0.650    |
| 29 – 34 mm                                | 702 (31.5%)                         | 293 (32.7%)                    | 0.485    |
| Other procedural aspects                  |                                     |                                |          |
| General anesthesia                        | 958 (42.3%)                         | 350 (38.5%)                    | 0.048    |
| Prior balloon valvuloplasty               | 1367 (65.9%)                        | 498 (60.1%)                    | 0.003    |
| Balloon post-dilatation                   | 511 (23.6%)                         | 112 (12.5%)                    | <0.001   |

\*= One center excluded that practices only ‘cut down’ technique for femoral access

†= femoral access only

BEV: Balloon expandable valve, SEV: Self expanding valve

**Table S2. Clinical end points and echocardiographic data post procedure for unmatched non-obese and morbidly obese cohorts.**

| Clinical endpoints                                                  | BMI 18.5-29.9<br>(n= 2,264) | BMI >35<br>(n= 910) | P      |
|---------------------------------------------------------------------|-----------------------------|---------------------|--------|
| Mortality                                                           |                             |                     |        |
| In-hospital mortality                                               | 82 (3.6%)                   | 35 (3.9%)           | 0.762  |
| In-hospital or 30-day mortality                                     | 86 (3.8%)                   | 43 (4.7%)           | 0.232  |
| Vascular complications                                              |                             |                     |        |
| Major                                                               | 103 (4.6%)                  | 60 (6.6%)           | 0.019  |
| Minor                                                               | 183 (10.3%)                 | 67 (8.7%)           | 0.196  |
| Vascular complications femoral access only                          |                             |                     |        |
| Major                                                               | 96 (4.8%)                   | 55 (7.0%)           | 0.022  |
| Minor                                                               | 182 (11.8%)                 | 62 (9.2%)           | 0.072  |
| Major vascular complications femoral access only by closure method* |                             |                     |        |
| Percutaneous closure device                                         | 71 (4.4%)                   | 44 (6.5%)           | 0.034  |
| Surgical cut-down technique                                         | 10 (9.5%)                   | 11 (14.3%)          | 0.321  |
| Bleeding                                                            |                             |                     |        |
| Life-threatening bleeding                                           | 69 (3.1%)                   | 23 (2.6%)           | 0.454  |
| Major bleeding                                                      | 134 (5.9%)                  | 51 (5.6%)           | 0.737  |
| Life-threatening and major                                          | 203 (9.0%)                  | 74 (8.1%)           | 0.451  |
| Minor bleeding                                                      | 217 (9.6%)                  | 61 (6.9%)           | 0.015  |
| AKI                                                                 |                             |                     |        |
| Stage I                                                             | 221 (14.4%)                 | 118 (14.5%)         | 0.920  |
| Stage II and III                                                    | 55 (3.6%)                   | 31 (3.8%)           | 0.769  |
| Any stage                                                           | 276 (18.0%)                 | 149 (18.4%)         | 0.814  |
| Coronary occlusion                                                  | 11 (0.5%)                   | 5 (0.5%)            | 0.819† |
| Peri-Procedural Stroke                                              | 39 (1.7%)                   | 14 (1.5%)           | 0.714  |
| Hospital acquired pneumonia                                         | 39 (1.9%)                   | 11 (1.2%)           | 0.236  |
| New permanent pacemaker implantation                                | 228 (11.2%)                 | 121 (14.7%)         | 0.010  |
| Length of hospital stay, days                                       | 6 [5-9]                     | 5 [3-8]             | <0.001 |
| Echocardiogram parameters within 30-day post-TAVR                   |                             |                     |        |
| Moderate-Severe Post TAVR                                           | 104 (4.7%)                  | 21 (2.4%)           | 0.004  |

|                                                  |              |             |        |
|--------------------------------------------------|--------------|-------------|--------|
| AR                                               |              |             |        |
| Postprocedural mean aortic valve gradient (mmHg) | 8 [6-11]     | 10 [7-14]   | <0.001 |
| Severe patient-prosthesis mismatch               | 20 (1.1%)    | 27 (3.5%)   | <0.001 |
| Device Success                                   | 2031 (89.7%) | 759 (83.4%) | <0.001 |
| Echocardiogram parameters at 1-year post TAVR    |              |             |        |
| Mean aortic valve gradient (mmHg)                | 8 [5.9-10.8] | 10 [7-15]   | <0.001 |

Values are expressed as n (%) or median [IQR]

\* One center excluded that practices only 'cut down' technique for femoral access

† Fischers exact test used

AR: aortic regurgitation, TAVR: transcatheter aortic valve replacement.

**Table S3. Univariable and multivariable analysis of all-cause mortality at 2 years in the whole cohort (non-obese and morbidly obese patients n=3174).**

|                                         | <b>Univariable<br/>analysis<br/>HR (95% CI)</b> | <b>p value</b> | <b>Multivariable<br/>analysis<br/>HR (95% CI)</b> | <b>p value</b> |
|-----------------------------------------|-------------------------------------------------|----------------|---------------------------------------------------|----------------|
| Morbid obesity                          | 1.01 (0.83-1.25)                                | 0.893          |                                                   |                |
| BMI                                     | 0.99 (0.99-1.01)                                | 0.826          |                                                   |                |
| BSA                                     | 1.16 (0.81-1.66)                                | 0.430          |                                                   |                |
| Diabetes                                | 1.24 (1.03-1.49)                                | 0.026          |                                                   |                |
| Hypertension                            | 1.32 (1.00-1.74)                                | 0.049          |                                                   |                |
| Smoking                                 | 1.25 (1.01-1.55)                                | 0.033          |                                                   |                |
| COPD                                    | 1.44 (1.18-1.75)                                | <0.001         | 1.38 (1.10-1.74)                                  | 0.006          |
| Severe pulmonary hypertension (>55mmHg) | 1.49 (1.17-1.90)                                | 0.001          |                                                   |                |
| Peripheral vascular disease             | 1.59 (1.26-1.99)                                | <0.001         |                                                   |                |
| Pre-existing atrial fibrillation        | 1.45 (1.20-1.74)                                | <0.001         |                                                   |                |
| eGFR <30                                | 2.24 (1.74-2.88)                                | <0.001         |                                                   |                |
| Baseline Haemoglobin *                  | 1.26 (1.13-1.41)                                | <0.001         |                                                   |                |
| Moderate-Severe MR                      | 1.29 (1.03-1.61)                                | 0.024          | 1.35 (1.05-1.75)                                  | 0.022          |
| Urgent/Emergent procedure               | 1.73 (1.29-2.33)                                | <0.001         |                                                   |                |
| Non-transfemoral access                 | 1.66 (1.32-2.09)                                | <0.001         | 1.51 (1.16-1.97)                                  | 0.002          |
| Conversion to surgery                   | 6.06 (2.87-12.79)                               | <0.001         |                                                   |                |
| Hospital acquired pneumonia             | 3.85 (2.56-5.82)                                | <0.001         |                                                   |                |
| Major vascular complications            | 1.97 (1.43-2.72)                                | <0.001         |                                                   |                |
| Life threatening or major bleeding      | 2.31 (1.80-2.96)                                | <0.001         | 1.86 (1.39-2.48)                                  | <0.001         |
| Blood transfusion                       | 1.69 (1.39-2.07)                                | <0.001         |                                                   |                |
| Periprocedural CVA                      | 3.49 (2.27-5.35)                                | <0.001         |                                                   |                |
| New onset atrial fibrillation           | 1.33 (1.00-1.766)                               | 0.051          |                                                   |                |
| Post procedure moderate-severe AR       | 1.79 (1.13-2.84)                                | 0.013          |                                                   |                |
| In-hospital days                        | 1.01 (1.01-1.02)                                | <0.001         |                                                   |                |
| AKI stage II-III                        | 4.65 (3.31-6.54)                                | <0.001         | 3.88 (2.72-5.53)                                  | <0.001         |

AKI: acute kidney injury, AR: aortic regurgitation, BMI: body mass index, BSA: body surface area, COPD: Chronic obstructive pulmonary disease, CVA: cerebrovascular accident, eGFR: estimated glomerular filtration rate, MR: mitral regurgitation.

\*For every 2gram decrease

**Table S4. Summary of body composition analysis.**

| Body composition component                                                   | Mean (SD)     |
|------------------------------------------------------------------------------|---------------|
| SAT area cm <sup>2</sup>                                                     | 357.9 (118.3) |
| iSAT area cm <sup>2</sup> /m <sup>2</sup>                                    | 172.4 (56.3)  |
| VAT area cm <sup>2</sup>                                                     | 311.3 (128.6) |
| iVAT area cm <sup>2</sup> /m <sup>2</sup>                                    | 146.0 (53.0)  |
| VAT:SAT                                                                      | 1.03 (0.77)   |
| Percentage Visceral adipose tissue                                           | 46 (13)       |
| IMAT cm <sup>2</sup>                                                         | 35.2 (19.0)   |
| iIMAT (indexed intramuscular adipose tissue) cm <sup>2</sup> /m <sup>2</sup> | 16.6 (8.7)    |
| Percentage fatty muscle (%)                                                  | 22.0 (10.0)   |
| IMAT:SMA                                                                     | 0.30 (0.19)   |
| SMA cm <sup>2</sup>                                                          | 127.3 (33.7)  |
| iSMA area cm <sup>2</sup> /m <sup>2</sup>                                    | 60.2 (13.5)   |
| Sarcopenic obesity*                                                          | 7.84%         |
| EAT volume cm <sup>3</sup>                                                   | 98.3 (50.4)   |
| iEAT cm <sup>3</sup> /m <sup>2</sup>                                         | 47.0 (23.1)   |

Values are presented as mean and standard deviation (SD). Indexed values are indexed to body surface area (BSA)

\*Sarcopenic obesity defined as height indexed skeletal muscle area (hiSMA)  $\leq 38.5\text{cm}^2/\text{m}^2$  for females and  $\leq 52.5\text{cm}^2/\text{m}^2$  for males

EAT: epicardial adipose tissue, iEAT: indexed epicardial adipose tissue, IAT: Intramuscular adipose tissue, iIMAT: indexed intramuscular adipose tissue, IMAT:SMA ratio of intramuscular fat area to skeletal muscle area, SAT: subcutaneous adipose tissue, iSAT: indexed subcutaneous fat, SMA: skeletal muscle area, iSMA: indexed skeletal muscle area, VAT: Visceral adipose tissue, iVAT: indexed visceral adipose tissue, VAT:SAT: ratio of visceral adipose tissue area to subcutaneous adipose tissue area.

**Table S5. Baseline characteristics in morbidly obese cohort according to VAT:SAT ratio.**

|                                         | VAT:SAT ratio <1<br>(n= 137) | VAT:SAT ratio ≥1<br>(n= 82) | P      |
|-----------------------------------------|------------------------------|-----------------------------|--------|
| Age, years                              | 77.4 (7.34)                  | 77.3 (6.7)                  | 0.892  |
| Female sex                              | 118 (86.1%)                  | 18 (23.2%)                  | <0.001 |
| Body mass index,<br>kg/m <sup>2</sup>   | 39.0 (3.9)                   | 38.5 (3.03)                 | 0.323  |
| Diabetes mellitus                       | 75 (54.74%)                  | 53 (64.63%)                 | 0.151  |
| -Insulin use                            | 27 (37.0%)                   | 29 (56.9%)                  | 0.029  |
| Hypertension                            | 123 (89.8%)                  | 78 (95.1%)                  | 0.164  |
| Hyperlipidaemia                         | 102 (74.5%)                  | 58 (73.4%)                  | 0.867  |
| Baseline creatinine<br>(mg/dL)          | 1.09 (0.46)                  | 1.40 (0.80)                 | <0.001 |
| eGFR <30<br>ml/min/1.73m <sup>2</sup>   | 8 (5.8%)                     | 9 (11.0%)                   | 0.196* |
| Coronary artery disease                 | 58 (42.3%)                   | 46 (56.1%)                  | 0.048  |
| Pre valve surgery                       | 9 (6.6%)                     | 4 (4.9%)                    | 0.608  |
| Valve in Valve TAVR                     | 6 (5.2%)                     | 2 (2.7%)                    | 0.468* |
| Atrial fibrillation                     | 45 (32.9%)                   | 26 (31.7%)                  | 0.862  |
| Previous pacemaker                      | 13 (9.5%)                    | 10 (12.2%)                  | 0.649  |
| COPD                                    | 35 (25.6%)                   | 28 (34.1%)                  | 0.174  |
| Previous<br>cerebrovascular<br>accident | 11 (8.0%)                    | 8 (9.8%)                    | 0.660  |
| Peripheral vascular<br>disease          | 16 (11.7%)                   | 15 (18.3%)                  | 0.174  |
| Baseline hemoglobin<br>(g/dL)           | 11.9 (1.6)                   | 12.2 (1.8)                  | 0.297  |
| NT-Pro BNP (median,<br>IQR)             | 877.45 [340 -1897]           | 887.5 [273-1677.5]          | 0.981  |
| Logistic EuroSCORE<br>[median IQR]      | 11.63 [7.05-17.02]           | 11.2 [8.12-17.0]            | 0.741  |
| EuroSCORE II<br>[median IQR]            | 2.97 [1.94-5.52]             | 4.56 [2.42-6.96]            | 0.026  |

|                        |                 |                 |       |
|------------------------|-----------------|-----------------|-------|
| STS [median IQR]       | 4.05 [2.9-6.71] | 4.1 [3.01-6.40] | 0.968 |
| Moderate or severe PHT | 57 (47.9%)      | 36 (54.6%)      | 0.386 |

Values are expressed as n (%) or median [IQR]

\*Fischer exact test used

eGFR: estimated glomerular filtration rate, PHT: pulmonary hypertension, TAVR:

transcatheter aortic valve replacement



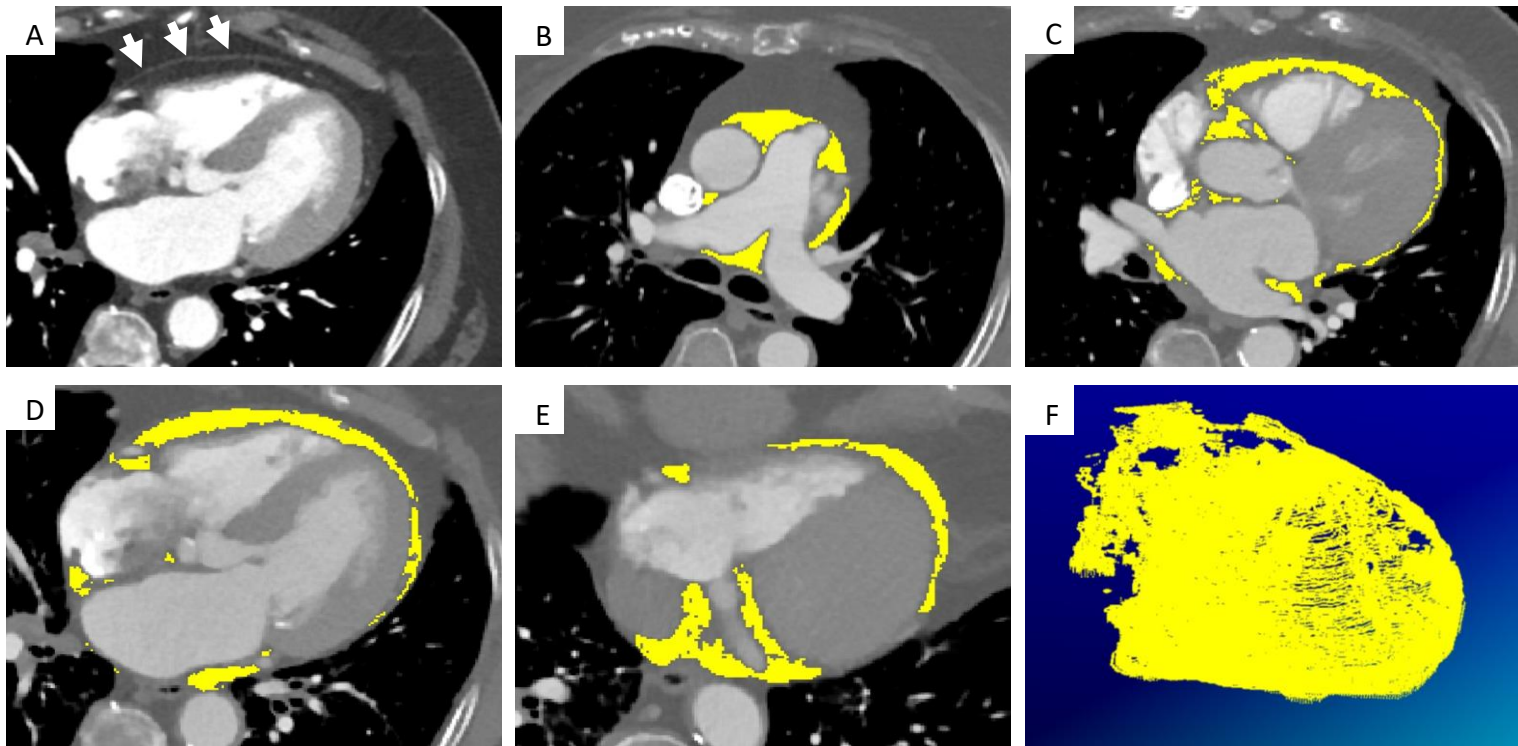

**Figure S1.** Typical cardiac CT, with contrast, demonstrating the fibrous pericardium (A, white arrows) and subsequent segmentation of epicardial adipose tissue (EAT) within the fibrous pericardium. Using a software package, EAT was segmented based on a Hounsfield unit thresholds of -190 to -30 from the bifurcation of the pulmonary artery (B) continuing to the diaphragm. Images C-E represent examples of slices taken from the mid atrial level, mid-ventricular 4-chamber and lower ventricular 4 chamber view respectively. Epicardial adipose tissue was manually redefined every 3 slices in order to correct contours and avoid inclusion of paracardial adipose tissue (outside the pericardial sac). The software calculated the EAT volume ( $\text{cm}^3$ ) by summing the EAT area in each slice and taking into account slice thickness and intersection gap. Image F represents a 3D reconstruction of the EAT in this patient (a female with BMI  $35.4\text{kg}/\text{m}^2$  and EAT volume of  $108.6\text{ cm}^3$  and iEAT of  $56.77\text{ cm}^3/\text{m}^2$ ).

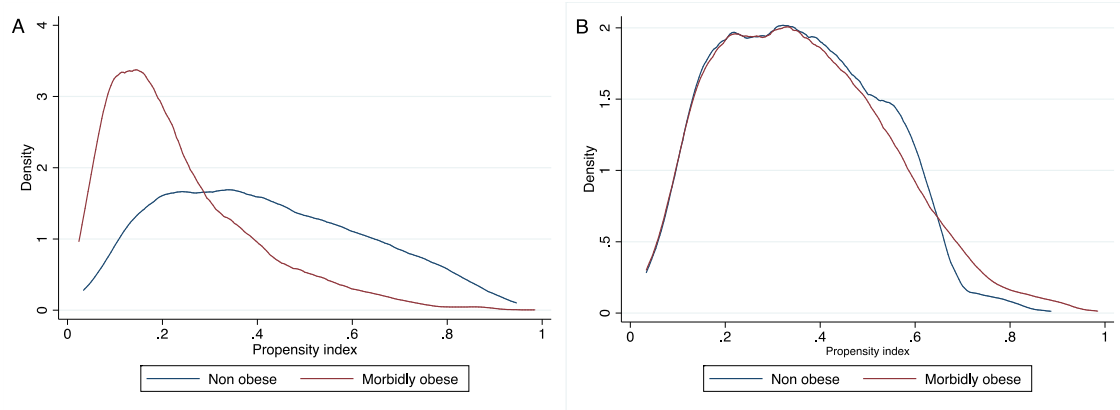

**Figure S2. Density plots showing the density index pre- (A) and post- (B) propensity-score matching.**

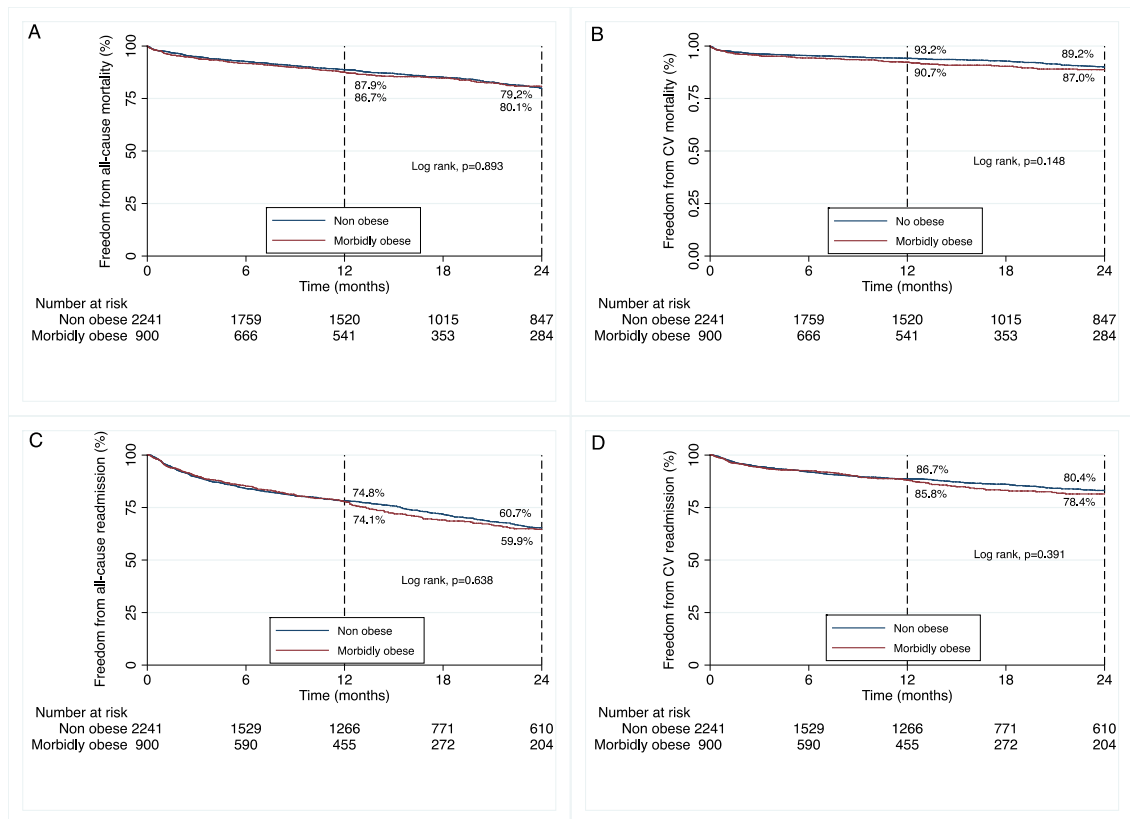

**Figure S3. Kaplan Meier graph demonstrating 2-year all-cause (A) and cardiovascular (B) mortality and 2-year all-cause (C) and cardiovascular (D) readmissions for non-obese and morbidly obese groups in the unmatched cohort.**

**Supplemental Video Legend:**

**Video S1. 3D reconstruction of epicardial fat segmentation.** The video demonstrates assessment of epicardial fat from the bifurcation of the pulmonary artery to the diaphragm.

Best viewed with Windows Media Player.
